# Supplementary material for: The Role of GaN in the Heterostructure WS2/GaN for SERS Applications
Source: MDPI journal article supplement (doi:10.3390/ma16083054), 2023-04-12
Supplement: s1 [file s1]

## Supplementary materials

### The role of GaN in the heterostructure $\text{WS}_2/\text{GaN}$ for SERS applications

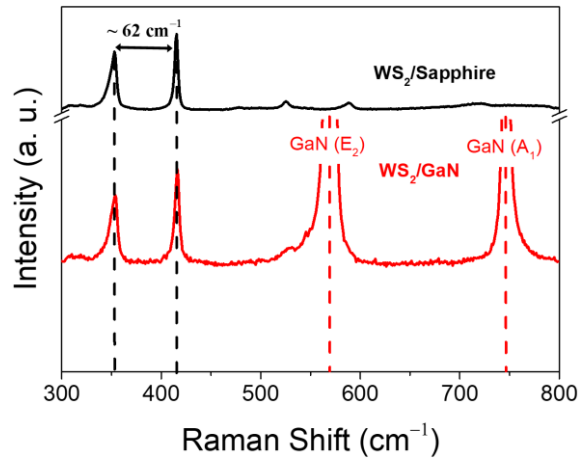

Figure S1. Additional Raman results of  $\text{WS}_2/\text{GaN}$  heterostructure.

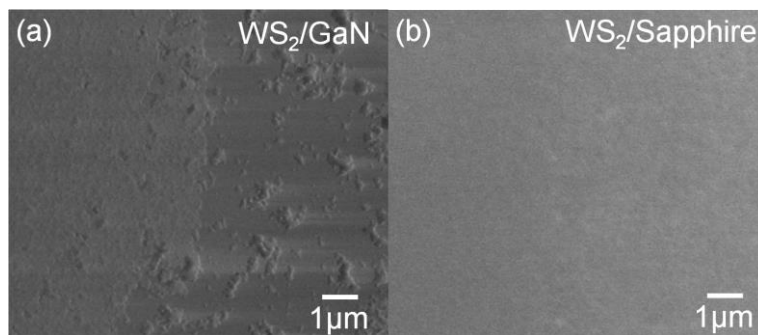

Figure S2. SEM images of different samples: (a)  $\text{WS}_2/\text{GaN}$ , and (b)  $\text{WS}_2/\text{sapphire}$ .

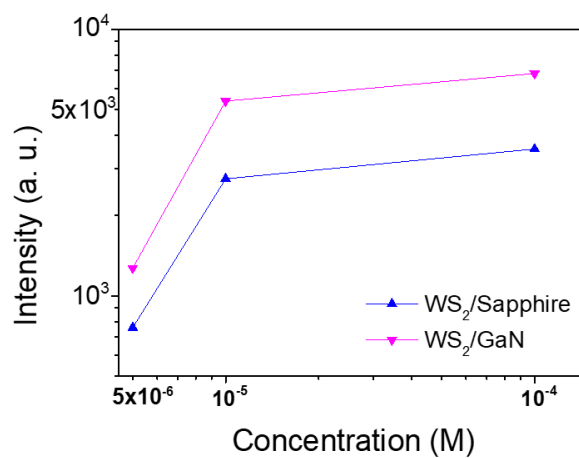

Figure S3. A relationship between the Raman peak intensities at  $611 \text{ cm}^{-1}$  and the R6G concentrations ( $5 \times 10^{-6}$  to  $10^{-4} \text{ M}$ ).
